# Supplementary material
Source: PubMed Central journal article supplement (PMC6679753)

## Supplemental Figure 1

| Accession | Description                                                                                      | Score  | # Proteins | # Unique Peptides | # Peptides | # PSMs | MW [kDa] |
|-----------|--------------------------------------------------------------------------------------------------|--------|------------|-------------------|------------|--------|----------|
| P51660    | Peroxisomal multifunctional enzyme type 2 OS=Mus musculus GN=Hsd17b4 PE=1 SV=3 - [DHB4_MOUSE]    | 176.28 | 1          | 14                | 14         | 46     | 79.4     |
| P11499    | Heat shock protein HSP 90-beta OS=Mus musculus GN=Hsp90ab1 PE=1 SV=3 - [HS90B_MOUSE]             | 39.62  | 3          | 4                 | 8          | 12     | 83.2     |
| P07901    | Heat shock protein HSP 90-alpha OS=Mus musculus GN=Hsp90aa1 PE=1 SV=4 - [HS90A_MOUSE]            | 25.27  | 2          | 1                 | 5          | 8      | 84.7     |
| P60710    | Actin, cytoplasmic 1 OS=Mus musculus GN=Actb PE=1 SV=1 - [ACTB_MOUSE]                            | 15.21  | 2          | 1                 | 1          | 4      | 41.7     |
| P20152    | Vimentin OS=Mus musculus GN=Vim PE=1 SV=3 - [VIME_MOUSE]                                         | 15.09  | 1          | 1                 | 1          | 4      | 53.7     |
| E9Q557    | Desmoplakin OS=Mus musculus GN=Dsp PE=1 SV=1 - [DESP_MOUSE]                                      | 10.79  | 1          | 2                 | 2          | 4      | 332.7    |
| P17897    | Lysozyme C-1 OS=Mus musculus GN=Lyz1 PE=1 SV=1 - [LYZ1_MOUSE]                                    | 9.79   | 1          | 1                 | 1          | 3      | 16.8     |
| Q8BLN5    | Lanosterol synthase OS=Mus musculus GN=Lss PE=1 SV=2 - [ERG7_MOUSE]                              | 3.87   | 1          | 1                 | 1          | 1      | 83.1     |
| P01942    | Hemoglobin subunit alpha OS=Mus musculus GN=Hba PE=1 SV=2 - [HBA_MOUSE]                          | 3.22   | 1          | 1                 | 1          | 1      | 15.1     |
| P20029    | 78 kDa glucose-regulated protein OS=Mus musculus GN=Hspa5 PE=1 SV=3 - [GRP78_MOUSE]              | 3.08   | 1          | 1                 | 1          | 1      | 72.4     |
| Q05920    | Pyruvate carboxylase, mitochondrial OS=Mus musculus GN=Pc PE=1 SV=1 - [PYC_MOUSE]                | 2.78   | 1          | 1                 | 1          | 1      | 129.6    |
| Q8VD57    | Vesicle transport protein SFT2B OS=Mus musculus GN=Sft2d2 PE=1 SV=1 - [SFT2B_MOUSE]              | 2.49   | 1          | 1                 | 1          | 1      | 17.5     |
| Q9QUJ7    | Long-chain-fatty-acid--CoA ligase 4 OS=Mus musculus GN=Acsl4 PE=1 SV=2 - [ACSL4_MOUSE]           | 2.34   | 1          | 1                 | 1          | 1      | 79.0     |
| Q8BT60    | Copine-3 OS=Mus musculus GN=Cpne3 PE=1 SV=2 - [CPNE3_MOUSE]                                      | 1.31   | 1          | 1                 | 1          | 1      | 59.5     |
| Q925E0    | Gamma-2-syntrophin OS=Mus musculus GN=Sntg2 PE=2 SV=1 - [SNTG2_MOUSE]                            | 1.20   | 1          | 1                 | 1          | 1      | 59.6     |
| Q6NWW3    | Intraflagellar transport protein 122 homolog OS=Mus musculus GN=Ift122 PE=1 SV=1 - [IF122_MOUSE] | 0.00   | 1          | 1                 | 1          | 1      | 134.7    |

# Supplemental Figure 2

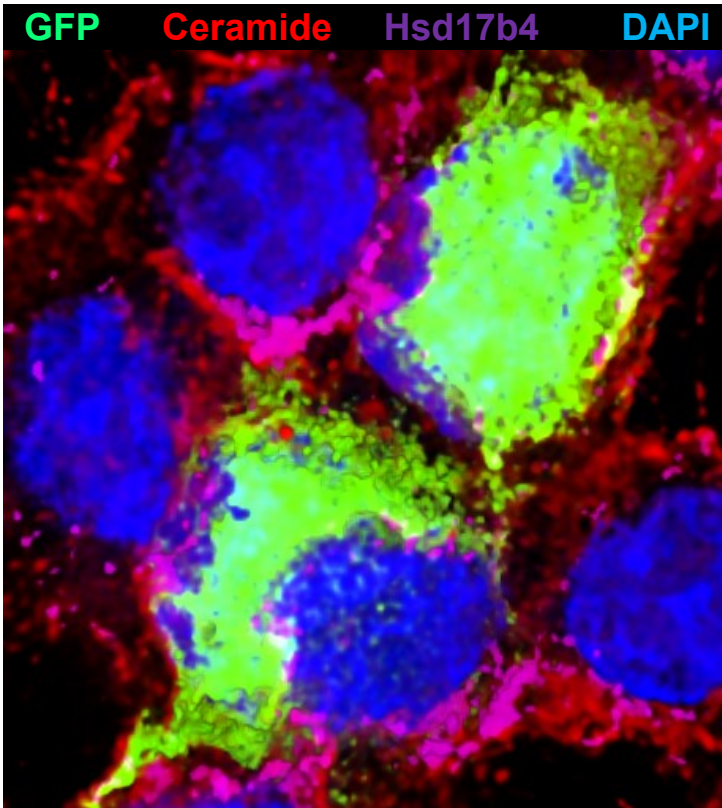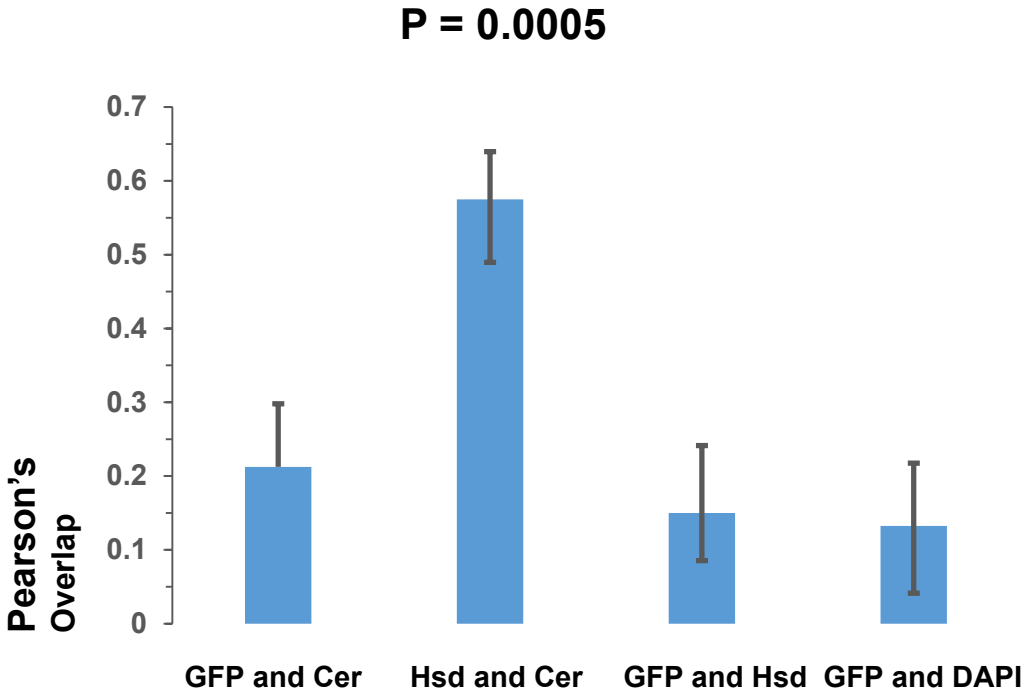

Supplement: NIHMS1533833-supplement-1.pdf [file NIHMS1533833-supplement-1.pdf]
